# Supplementary material for: In Vitro Effect of the Common Culinary Herb Winter Savory (Satureja montana) against the Infamous Food Pathogen Campylobacter jejuni
Source: PubMed Central journal article supplement (PMC7230815; doi:10.3390/foods9040537), 2020-04-24
Supplement: foods-09-00537-s001.pdf [file foods-09-00537-s001.pdf]

## Supplementary information

Table S1. Strain designation, description and reference of strains used in the study.

| <i>C. jejuni</i> strain designation | Description                                                                 | Reference       |
|-------------------------------------|-----------------------------------------------------------------------------|-----------------|
| 11168                               | NCTC reference strain                                                       | NCTC            |
| $\Delta cmeB$                       | Insertional mutant in the gene <i>cmeB</i> from <i>C. jejuni</i> NCTC 11168 | [19]            |
| $\Delta cmeR$                       | Insertional mutant in the gene <i>cmeR</i> from <i>C. jejuni</i> NCTC 11168 | [19]            |
| $\Delta cmeF$                       | Insertional mutant in the gene <i>cmeF</i> from <i>C. jejuni</i> NCTC 11168 | [19]            |
| $\Delta cmeG$                       | Insertional mutant in the gene <i>cmeG</i> from <i>C. jejuni</i> NCTC 11168 | This study; [6] |

Table S2. UHPLC-PDA-ESI-MS analysis of the ethanolic extract of *Satureja montana* herbal parts.

| Peak | [M+H] <sup>+</sup> | [M-H] <sup>-</sup> | UV            | Compound                                                             |
|------|--------------------|--------------------|---------------|----------------------------------------------------------------------|
| 1    | 361                | 359                | 330, 290sh    | Rosmarinic acid                                                      |
| 2    | 539                | 537                | 325, 299      | Caffeoyl rosmarinic acid isomer                                      |
| 3    | 593                | 591                | 335, 270      | Apigeninmethyl ether hexosyl-<br><del>deoxyhexoside</del> rhamnoside |
| 4    | 361                | 359                | 347, 291, 256 | Trihydroxy-trimethoxyflavone <del>isomer</del>                       |
| 5    | 315                | 313                | 337, 277      | Dihydroxy-dimethoxyflavone <del>isomer</del>                         |
| 6    | 164, 165*          | 164, 163*          | 264sh, 257    | Thymoquinone                                                         |
| 7    | ---**              | ---**              | 278, 219, 199 | Carvacrol                                                            |

\*low intensity; in mixture with a dihydroxy-trimethoxyflavone ~~isomer~~

\*\*no ~~signal~~ ionization in ESI positive and negative mode

Table S3. Chemical analysis of *S. montana* essential oil

| Peak | Ret. Time | RI   | Relative proportion (area %) | Substance                              |
|------|-----------|------|------------------------------|----------------------------------------|
| 1    | 5.616     | 925  | 0.333                        | $\alpha$ -Thujene                      |
| 2    | 5.806     | 932  | 0.391                        | $\alpha$ -Pinene                       |
| 3    | 6.212     | 947  | 0.195                        | Camphene                               |
| 4    | 7.039     | 977  | 1.06                         | 1-octen-3-ol                           |
| 5    | 7.423     | 990  | 0.269                        | Myrcene                                |
| 6    | 8.286     | 1016 | 0.704                        | $\delta$ -2-Carene/ $\delta$ -3-Carene |
| 7    | 8.601     | 1025 | 19.25                        | <i>p</i> -Cymene                       |
| 8    | 8.715     | 1028 | 0.315                        | Limonene                               |
| 9    | 8.796     | 1030 | 0.465                        | 1,8-Cineole                            |
| 10   | 9.794     | 1057 | 3.274                        | $\gamma$ -Terpinene                    |
| 11   | 10.091    | 1066 | 0.874                        | (not identified)                       |
| 12   | 11.28     | 1098 | 0.355                        | (not identified)                       |
| 13   | 11.36     | 1100 | 0.935                        | $\delta$ -3-Carene                     |
| 14   | 13.158    | 1144 | 0.186                        | Camphor                                |
| 15   | 14.02     | 1164 | 0.963                        | Isoborneol                             |
| 16   | 14.518    | 1176 | 0.767                        | Terpinen-4-ol                          |
| 17   | 14.856    | 1185 | 0.39                         | (not identified)                       |
| 18   | 15.092    | 1190 | 0.232                        | Isosylvestrene                         |
| 19   | 17.44     | 1246 | 0.213                        | Carvone                                |
| 20   | 17.638    | 1250 | 1.812                        | Thymoquinone                           |
| 21   | 19.116    | 1285 | 0.202                        | trans-Anethole                         |
| 22   | 19.486    | 1294 | 1.447                        | Thymol                                 |
| 23   | 20.066    | 1307 | 63.402                       | Carvacrol                              |
| 24   | 20.63     | 1321 | 0.398                        | 2,5-Diethylphenol                      |
| 25   | 24.692    | 1418 | 0.271                        | Caryophyllene (E-)                     |
| 26   | 28.335    | 1509 | 0.246                        | $\beta$ -Bisabolene                    |
| 27   | 30.994    | 1577 | 0.327                        | Isolongifolene                         |
| 28   | 31.137    | 1581 | 0.725                        | $\beta$ -Longipinene                   |
